# Supplementary material for: Exploring the anti-aging effects of fisetin in telomerase-deficient progeria mouse model
Source: PeerJ. 2023 Dec 12;11:e16463. doi: 10.7717/peerj.16463 (PMC10722989; doi:10.7717/peerj.16463)
Supplement: Supplemental Information 2 [file peerj-11-16463-s002.xlsx]

## Sheet: Sheet1
	Stc1	Gapdh
WT-1	11.07	23.58
	11.18	23.85
	11.32	23.83
WT-2	11.09	23.44
	10.99	23.43
	11.26	23.67
WT-3	10.99	22.17
	11.22	22.45
	11.03	22.1
WT+Fisetin-1	11.54	23.81
	11.36	23.66
	11.68	23.8
WT+Fisetin-2	11.14	22.08
	11.09	21.84
	11.17	22.02
WT+Fisetin-3	11.14	21.5
	11.22	21.69
	11.3	21.55
G3 TERT-/--1	11.14	20.05
	11.18	20.14
	11.02	19.93
G3 TERT-/--2	11.36	21.38
	11.47	21.58
	11.36	21.58
G3 TERT-/--3	11.13	20.66
	11.21	20.69
	11.32	20.77
G3 TERT-/- + Fisetin-1	10.95	21.77
	10.89	21.56
	11.01	21.84
G3 TERT-/- + Fisetin-2	10.92	21.77
	11.12	21.9
	10.97	21.66
G3 TERT-/- + Fisetin-3	11.34	22.56
	11.66	23.34
	11.96	22.58
